# Supplementary material for: Bismuth(iii)-catalyzed regioselective alkylation of tetrahydroquinolines and indolines towards the synthesis of bioactive core-biaryl oxindoles and CYP19 inhibitors
Source: Royal Society of Chemistry journal article supplement (doi:10.1039/d0ob02385j), 2020-12-17
Supplement: d0ob02385j1.pdf [file d0ob02385j1.pdf]

Explore

Explore Reaction

resulted in 0 reactions

[Return](#)

[Find Additional Reactions](#)

SciPlanner

[Reaction Structure](#) [substructure](#)

> **reactions (0)**

Explore reactions by reactions *substructure*

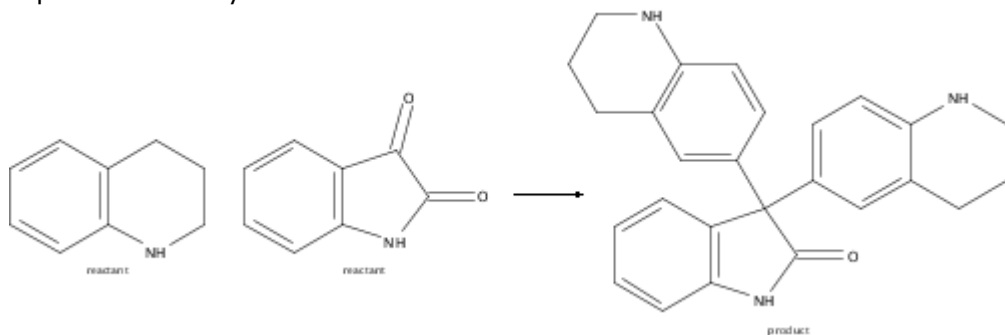

Limiters:

[Contact Us](#) | [Legal](#)

Copyright © 2020 American Chemical Society. All Rights Reserved. | 京ICP备13047075号-3
