# Supplementary material for: Bismuth(iii)-catalyzed regioselective alkylation of tetrahydroquinolines and indolines towards the synthesis of bioactive core-biaryl oxindoles and CYP19 inhibitors
Source: Royal Society of Chemistry journal article supplement (doi:10.1039/d0ob02385j), 2020-12-17
Supplement: d0ob02385j3.pdf [file d0ob02385j3.pdf]

CAS Solutions

Preferences | SciFinder Help

[Sign Out](#)

Welcome NAMRATA PRUSTY

[Explore](#)

[Saved Searches](#)

Explore Reaction resulted in 0 reactions

[Return](#)

[Find Additional Reactions](#)

[SciPlanner](#)

[Reaction Structure substructure](#)

**reactions (0)**

Explore reactions by reactions *substructure*

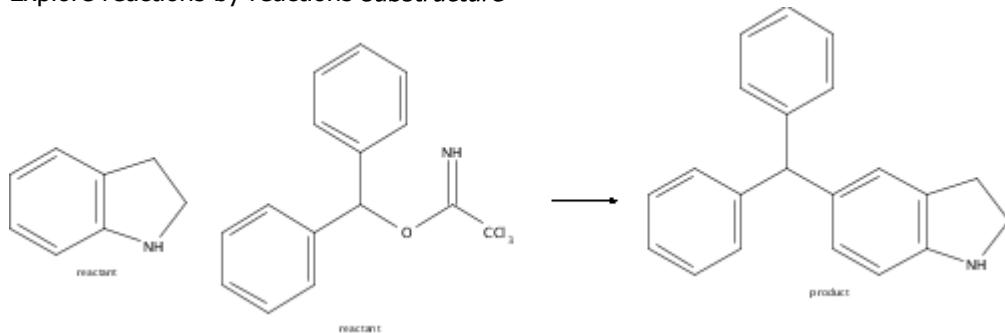

Limiters:

[Contact Us](#) | [Legal](#)

Copyright © 2020 American Chemical Society. All Rights Reserved. | 京ICP备13047075号-3
